# Supplementary material
Source: publisher figshare collection journal article supplement (https://karger.figshare.com/articles/dataset/_/28587359)
Supplement: Supplementary file 1 [file 1]

**Supplementary table 2. Summary of *APC* mutation detected in present study**

| Nucleotide | AA mutation | Cases |
| --- | --- | --- |
| c.4348C>T | p.Arg1450Ter | 15 |
| c.694C>T | p.Arg232Ter | 12 |
| c.637C>T | p.Arg213Ter | 11 |
| c.646C>T | p.Arg216Ter | 8 |
| c.3927_3931del | p.Glu1309fs | 7 |
| c.847C>T | p.Arg283Ter | 6 |
| c.1213C>T | p.Arg405Ter | 6 |
| c.3922A>T | p.Lys1308Ter | 6 |
| c.4099C>T | p.Gln1367Ter | 5 |
| c.4393_4394del | p.Ser1465fs | 5 |
| c.1495C>T | p.Arg499Ter | 4 |
| c.2413C>T | p.Arg805Ter | 4 |
| c.2626C>T | p.Arg876Ter | 4 |
| c.4285C>T | p.Gln1429Ter | 4 |
| c.1660C>T | p.Arg554Ter | 3 |
| c.3880C>T | p.Gln1294Ter | 3 |
| c.3916G>T | p.Glu1306Ter | 3 |
| c.4135G>T | p.Glu1379Ter | 3 |
| c.4216C>T | p.Gln1406Ter | 3 |
| c.1690C>T | p.Arg564Ter | 2 |
| c.2804dup | p.Tyr935Ter | 2 |
| c.3088A>T | p.Lys1030Ter | 2 |
| c.3340C>T | p.Arg1114Ter | 2 |
| c.3925G>T | p.Glu1309Ter | 2 |
| c.3949G>T | p.Glu1317Ter | 2 |
| c.4189G>T | p.Glu1397Ter | 2 |
| c.425C>A | p.Ser142Ter | 1 |
| c.562C>T | p.Gln188Ter | 1 |
| c.615_625del | p.Thr206fs | 1 |
| c.690del | p.Ile231fs | 1 |
| c.645del | p.Gln215fs | 1 |
| c.706C>T | p.Gln236Ter | 1 |
| c.770del | p.Ala257fs | 1 |
| c.896_897del | p.Ser299fs | 1 |
| c.904C>T | p.Arg302Ter | 1 |
| c.1354_1355del | p.Val452fs | 1 |
| c.1499dup | p.Tyr500Ter | 1 |
| c.1600A>T | p.Lys534Ter | 1 |
| c.1682dup | p.Thr562fs | 1 |
| c.1682del | p.Lys561fs | 1 |
| c.1744G>T | p.Glu582Ter | 1 |
| c.1875_1878del | p.Asn627fs | 1 |
| c.2140A>T | p.Lys714Ter | 1 |
| c.2299C>T | p.Gln767Ter | 1 |
| c.2432C>G | p.Ser811Ter | 1 |
| c.2555T>A | p.Leu852Ter | 1 |
| c.2793_2796del | p.His931fs | 1 |
| c.2804_2805delinsGA | p.Tyr935Ter | 1 |
| c.2821G>T | p.Glu941Ter | 1 |
| c.2825del | p.Asn942fs | 1 |
| c.3046_3053dup | p.Asp1018fs | 1 |
| c.3103C>T | p.Gln1035Ter | 1 |
| c.3138_3141del | p.Asn1046fs | 1 |
| c.3190G>T | p.Glu1064Ter | 1 |
| c.3203C>G | p.Ser1068Ter | 1 |
| c.3295_3296del | p.Val1099fs | 1 |
| c.3317del | p.Gly1106fs | 1 |
| c.3329C>G | p.Ser1110Ter | 1 |
| c.3363del | p.Asn1122fs | 1 |
| c.3505G>T | p.Glu1169Ter | 1 |
| c.3544A>T | p.Lys1182Ter | 1 |
| c.3577_3578del | p.Gln1193fs | 1 |
| c.3593C>G | p.Ser1198Ter | 1 |
| c.3610C>T | p.Gln1204Ter | 1 |
| c.3709_3710del | p.Gln1237fs | 1 |
| c.3730C>T | p.Gln1244Ter | 1 |
| c.3778C>T | p.Gln1260Ter | 1 |
| c.3786T>A | p.Tyr1262Ter | 1 |
| c.3815C>A | p.Ser1272Ter | 1 |
| c.3827C>G | p.Ser1276Ter | 1 |
| c.3856G>T | p.Glu1286Ter | 1 |
| c.3859del | p.Ile1287Ter | 1 |
| c.3871C>T | p.Gln1291Ter | 1 |
| c.3907C>T | p.Gln1303Ter | 1 |
| c.3919del | p.Ile1307Ter | 1 |
| c.3924dup | p.Glu1309fs | 1 |
| c.3935del | p.Gly1312fs | 1 |
| c.3956del | p.Pro1319fs | 1 |
| c.3964G>T | p.Glu1322Ter | 1 |
| c.3982C>T | p.Gln1328Ter | 1 |
| c.3982_3983del | p.Gln1328fs | 1 |
| c.3991A>T | p.Arg1331Ter | 1 |
| c.4010_4011del | p.Leu1337fs | 1 |
| c.4031C>A | p.Ser1344Ter | 1 |
| c.4048A>T | p.Lys1350Ter | 1 |
| c.4063dup | p.Ser1355fs | 1 |
| c.4087A>T | p.Lys1363Ter | 1 |
| c.4118dup | p.Glu1374Ter | 1 |
| c.4132C>T | p.Gln1378Ter | 1 |
| c.4147_4148del | p.Met1383fs | 1 |
| c.4175C>A | p.Ser1392Ter | 1 |
| c.4192_4193del | p.Arg1399fs | 1 |
| c.4199C>A | p.Ser1400Ter | 1 |
| c.4210_4211del | p.Ser1404fs | 1 |
| c.4280del | p.Pro1427fs | 1 |
| c.4312del | p.Thr1438fs | 1 |
| c.4324_4340del | p.Pro1442fs | 1 |
| c.4360A>T | p.Lys1454Ter | 1 |
| c.4364dup | p.Asn1455fs | 1 |
| c.4415del | p.Val1472fs | 1 |
| c.4418del | p.Asn1473fs | 1 |
| c.4419del | p.Asn1473fs | 1 |
| c.4429C>T | p.Gln1477Ter | 1 |
| c.4457del | p.Asp1486fs | 1 |
| c.4467del | p.Leu1489fs | 1 |
| c.4473del | p.Phe1491fs | 1 |
| c.4473dup | p.Ala1492fs | 1 |
| c.4479_4480del | p.Glu1494fs | 1 |
| c.4480del | p.Glu1494fs | 1 |
| c.4537G>T | p.Glu1513Ter | 1 |
| c.4588G>T | p.Glu1530Ter | 1 |
| c.4651A>T | p.Lys1551Ter | 1 |
| c.4682dup | p.Asp1562fs | 1 |
| c.4711_4721del | p.Asp1571fs | 1 |
| c.4729G>T | p.Glu1577Ter | 1 |
| c.4730_4731dellinsu | p.Glu1577fs | 1 |
| c.4741del | p.Ser1581fs | 1 |
| c.5465T>A | p.Val1822Asp | 1 |
| c.5572C>T | p.Arg1858Ter | 1 |
| c.5978del | p.Pro1993fs | 1 |
| c.7512G>A | p.Trp2504Ter | 1 |
| c.7709C>A | p.Ser2570Ter | 1 |

*Abbreviation*: *AA* Amino acid
